# Supplementary material
Source: PubMed Central journal article supplement (PMC3048082)
Supplement: cc1001_0156SD1.pdf [file cc1001_0156SD1.pdf]

## Supplementary Figures and Legends

**Figure S1:** Competitive fitness, growth curves, and representative flow cytometry profiles for all 49 long-lived strains examined

**Figure S2: Competitive fitness control experiments**

- a) Heat map representing the relative fitness of strains initially inoculated with different ratios of WT/mutant by volume. Green indicates relative fitness  $< 0$  (outcompeted by wild type), red indicates relative fitness  $> 0$ . Statistical significance was determined at week 3.
- b) Heat map as in (a) for the random mutants chosen for this study.

**Figure S3: Translation mutants have decreased mean cell size**

- a) Representative forward scatter graphs for sample strains.
- b) Strains which showed a significant difference in mean cell size from wild type by forward scatter.

**Figure S4: Long lived mutants found to be diploid**

- a) Representative flow cytometry profiles of log phase SYTOX Green stained yeast.
- b) Replicative lifespans of remade *rpl20b* $\Delta$ . The number of mother cells is shown in (), mean lifespan in [].

**Figure S5: Long lifespan has negligible fitness benefit.** Graph values are from an in silico simulation of a WT mutant (RLS=26) in competition with a mutant with equal doubling time but much greater lifespan (RLS=52)

**Figure S6:** Heat map representing the relative fitness of all strains tested in this study. Green indicates relative fitness  $< 0$  (outcompeted by wild type), red indicates relative fitness  $> 0$ . Statistical significance was determined at week 3.

**Table S1: Competitive fitness and growth rate data of randomly tested strains**

- a) Relative fitness data for randomly tested strains.  $n=3$  and error values are in s.e.m. \* $p < 0.05$ , \*\* $p < 0.01$
- b) Maximal growth rates for randomly tested strains.  $n=3$  and error values are in s.e.m.

Figure S1

Mutant  
BY4742 (WT)

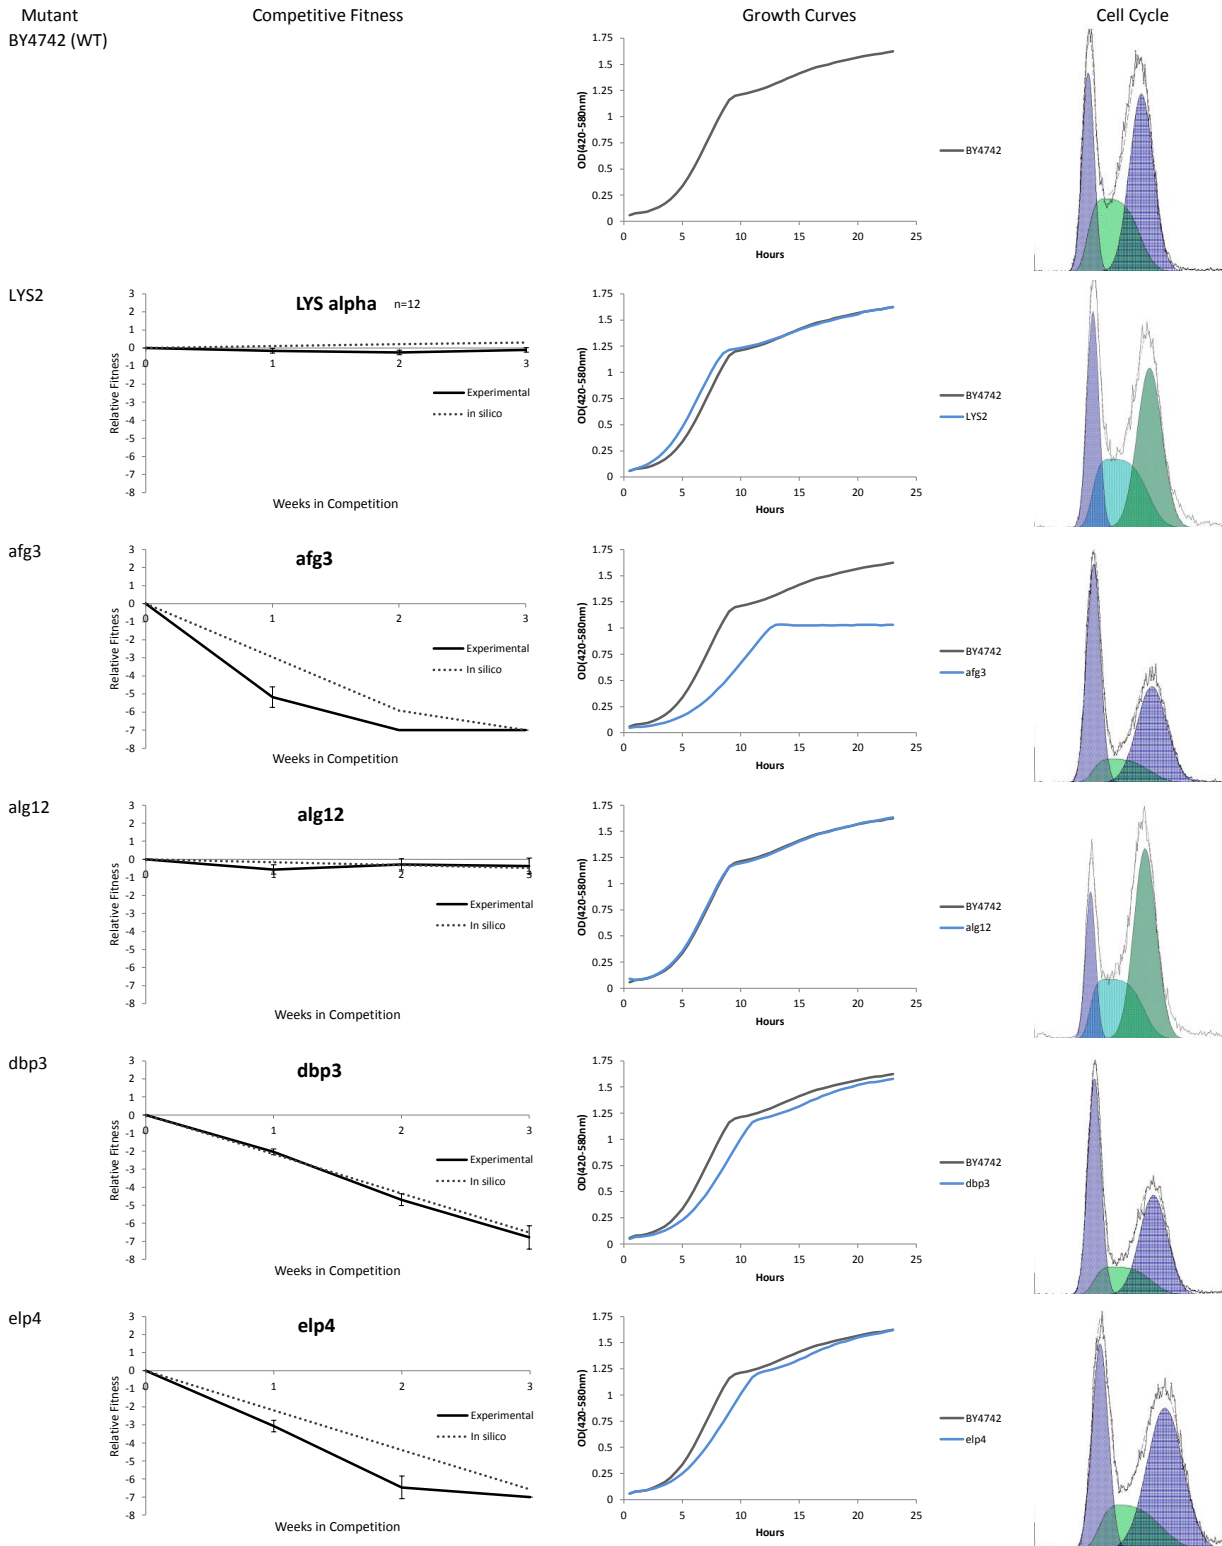

fob1

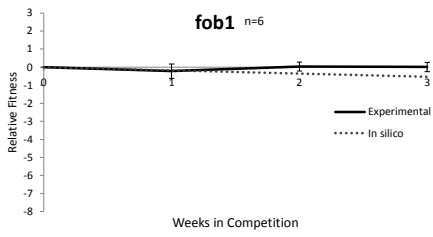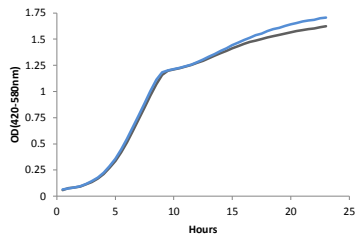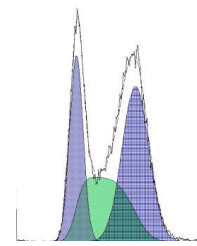

gpa2

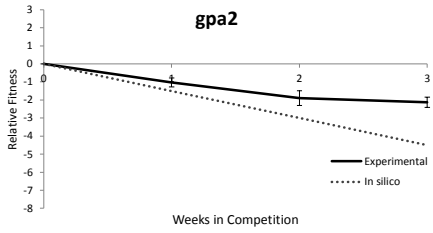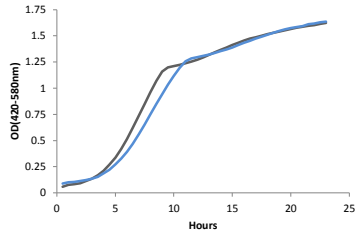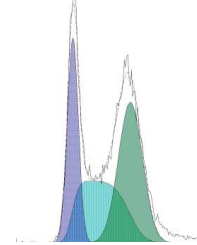

gpr1

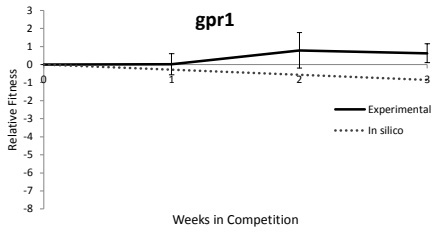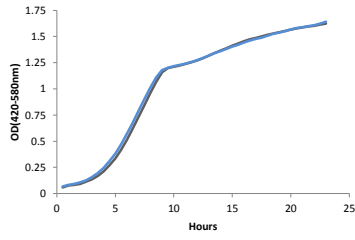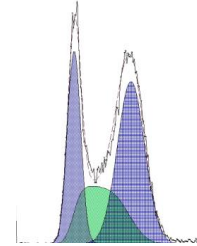

hse1

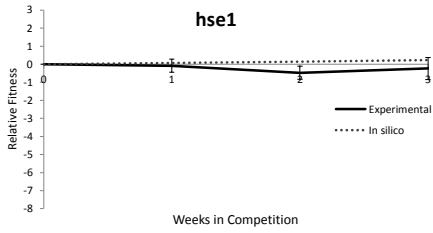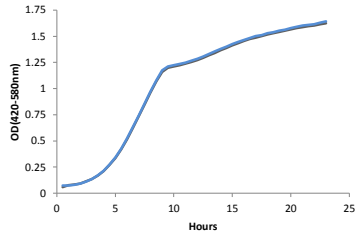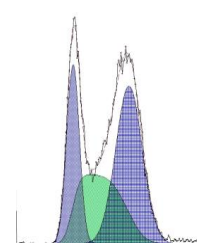

idh1

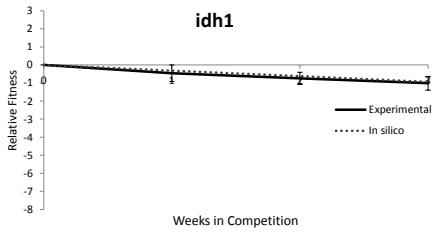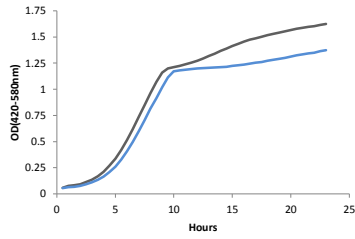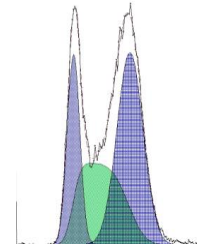

idh2

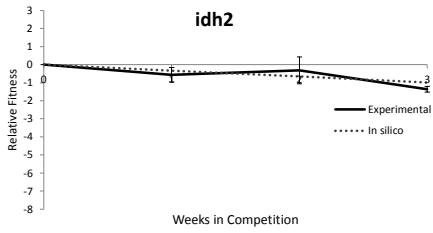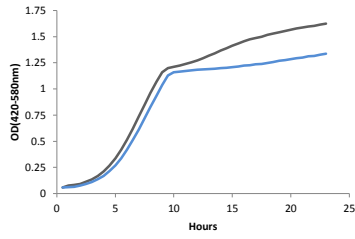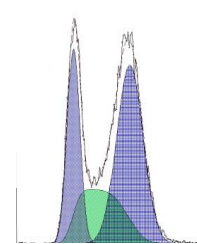

inp51

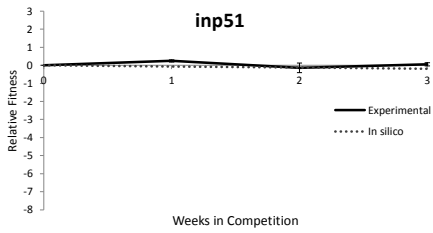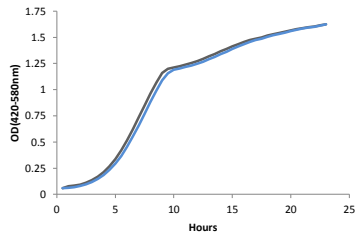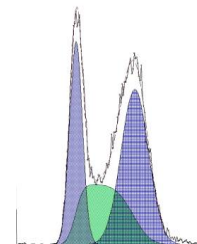

inp53

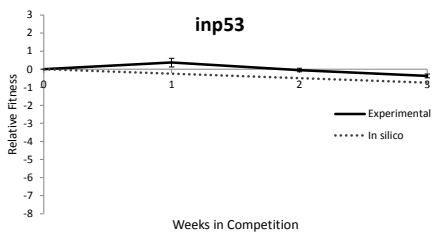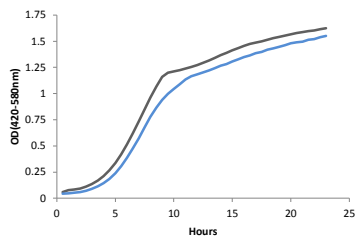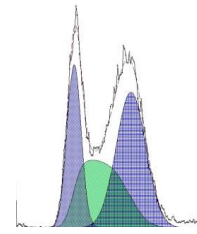

msw1

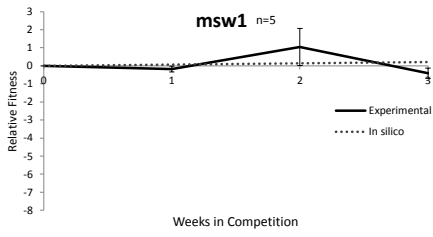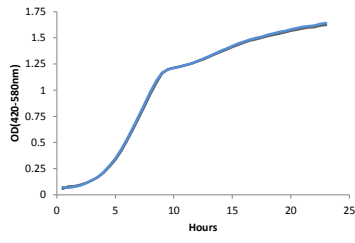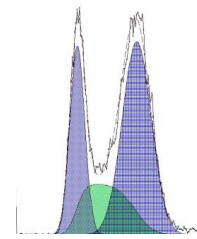

pkh2

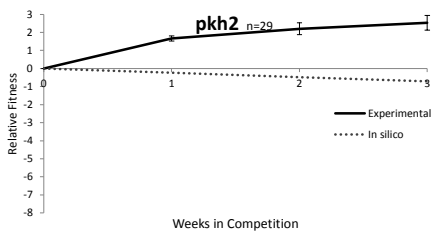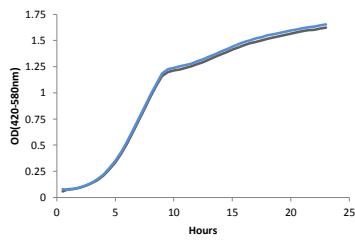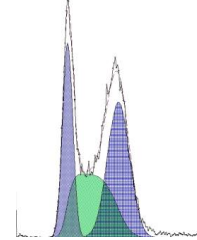

pmr1

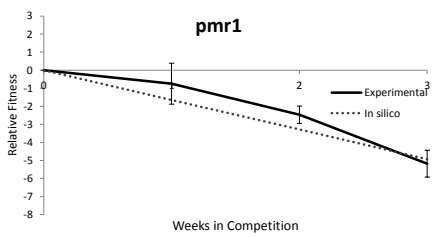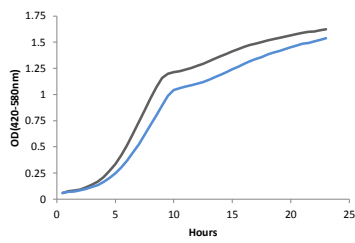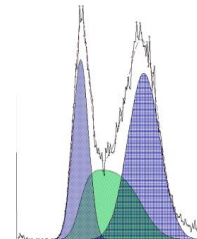

rei1

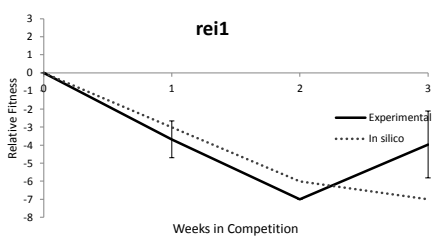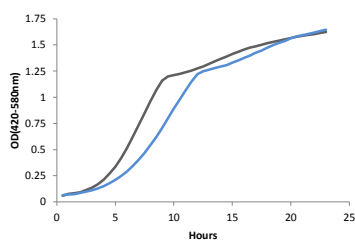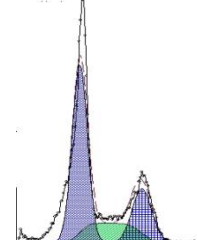

rim1

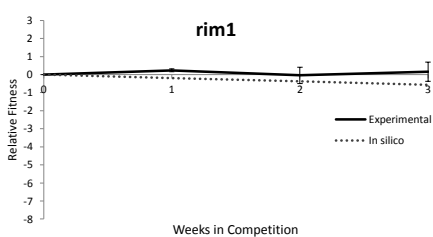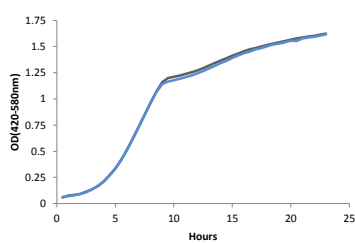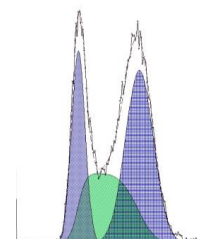

rpl13a

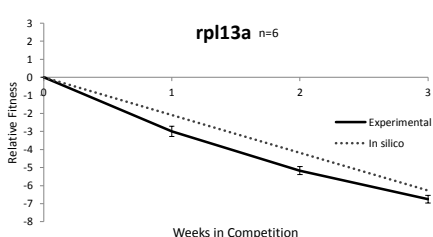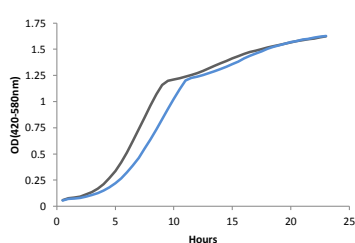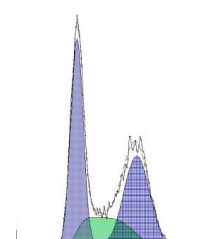

rpl19a

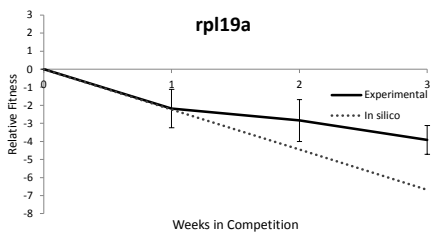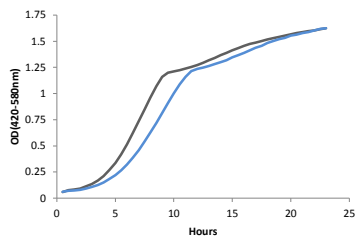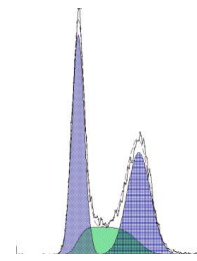

rpl21b

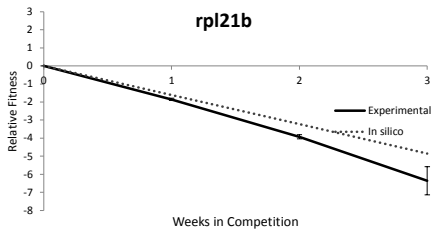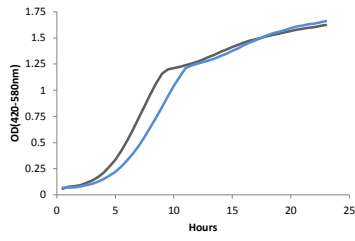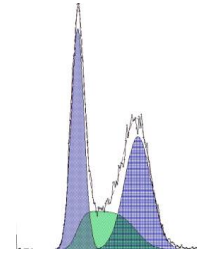

rpl22a

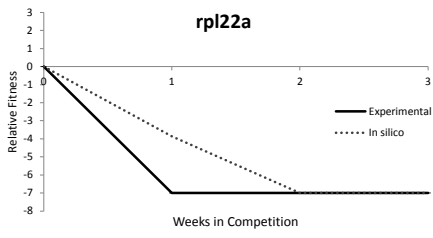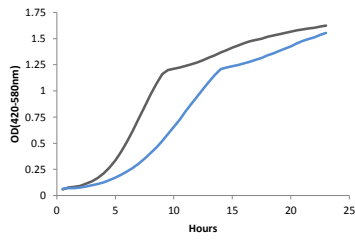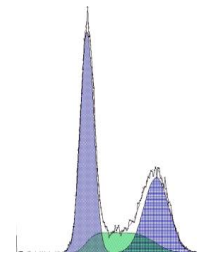

rpl23a

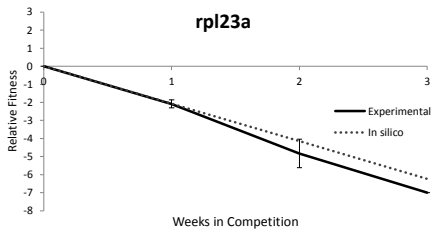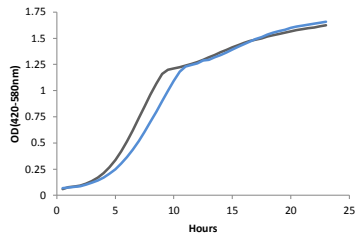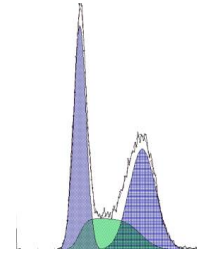

rpl29

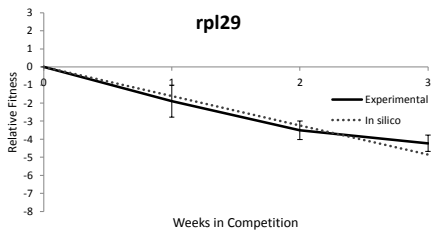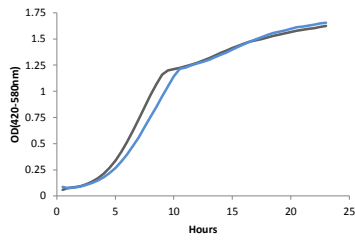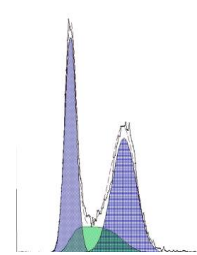

rpl31a

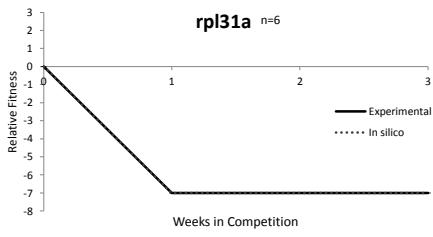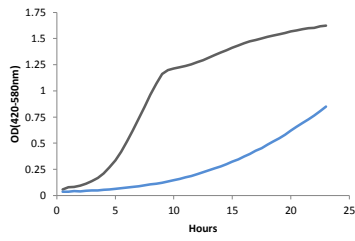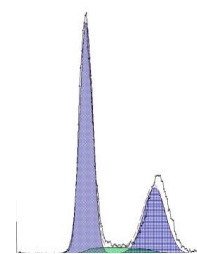

rpl37b

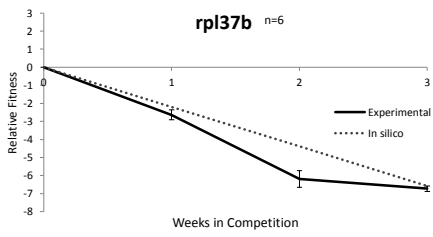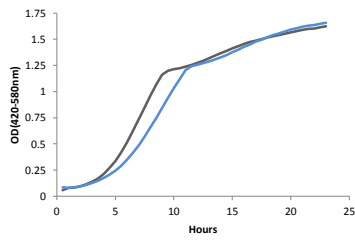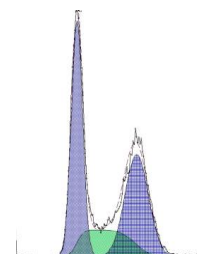

rpl43b

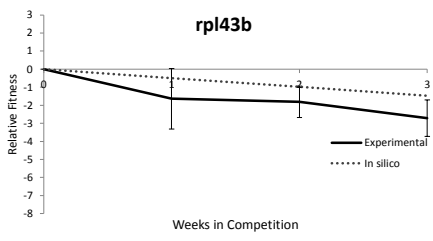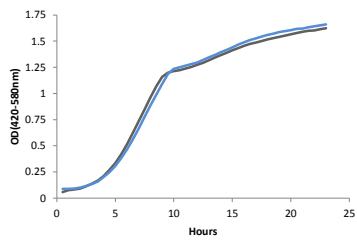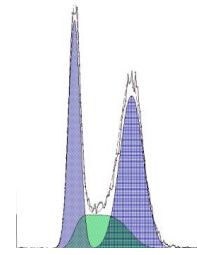

rpl6b

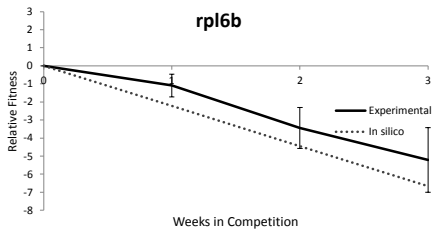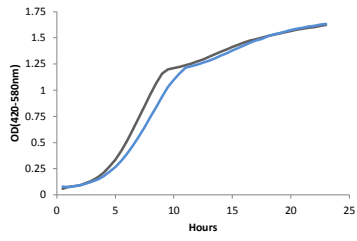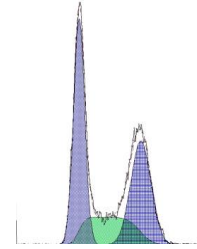

rpl7a

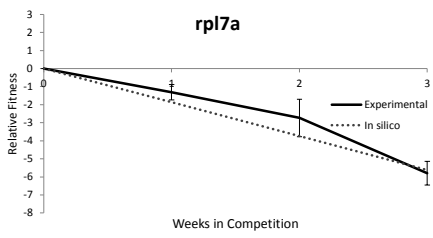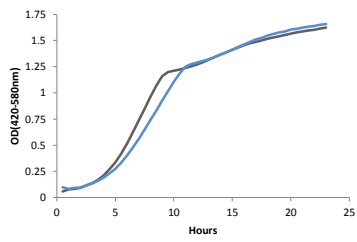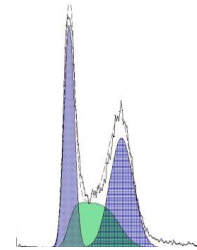

rpl9a

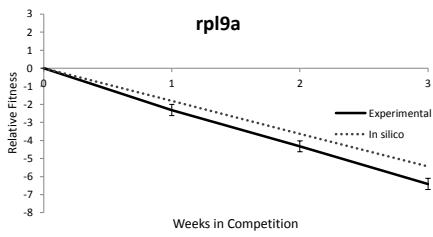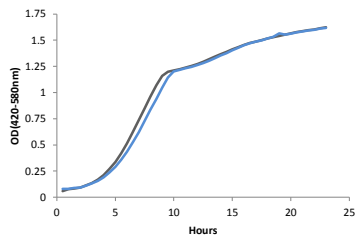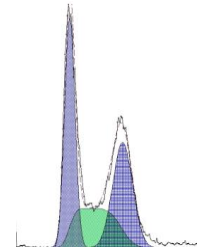

rpp2b

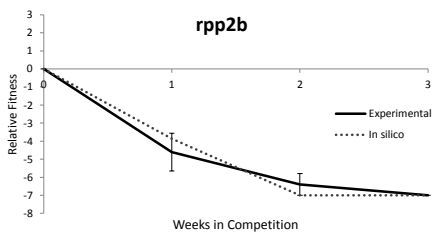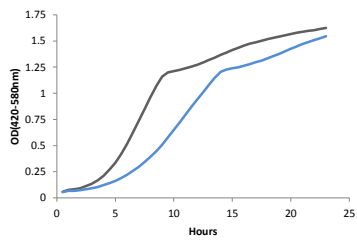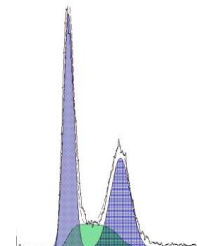

sam1

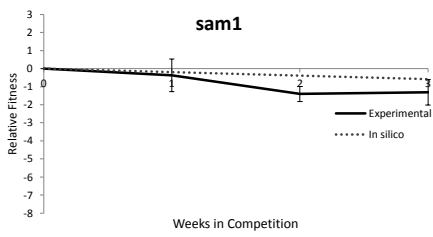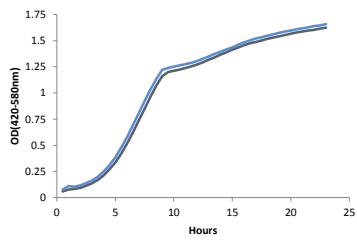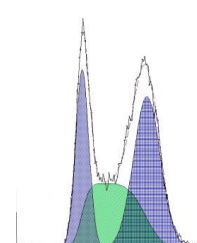

sch9

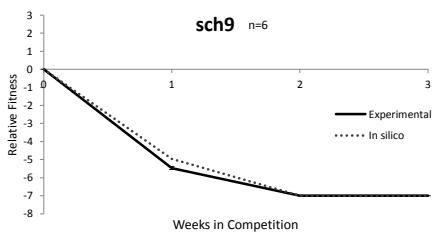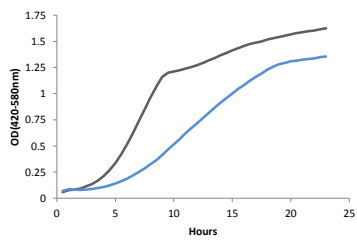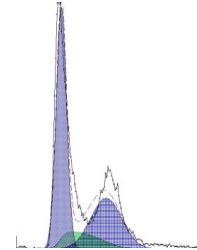

sip2

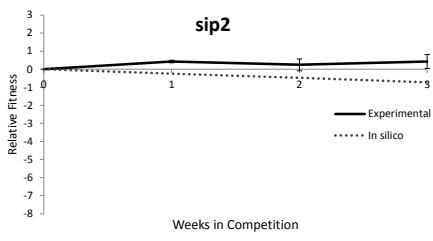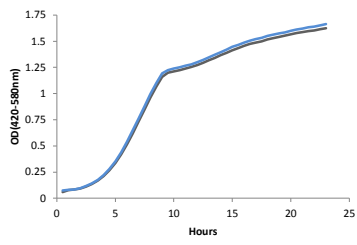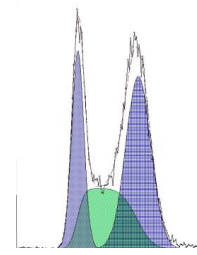

SIR2OX

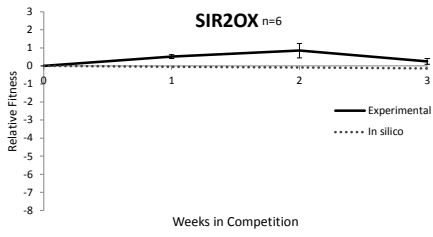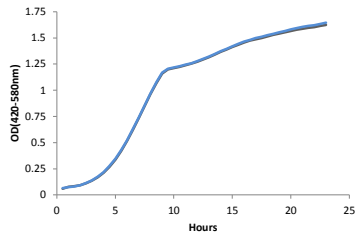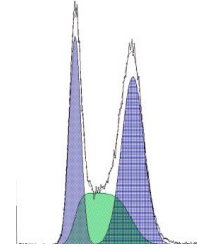

sok1

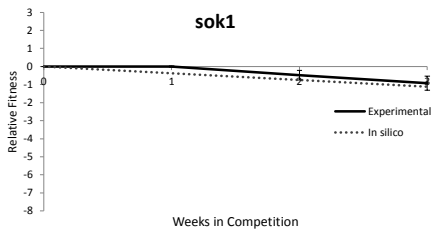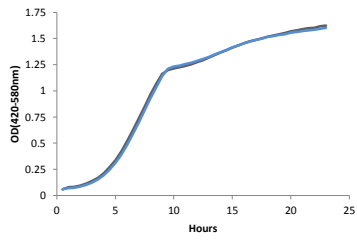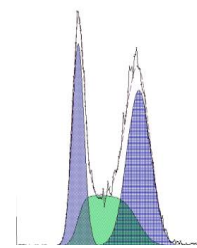

sps1

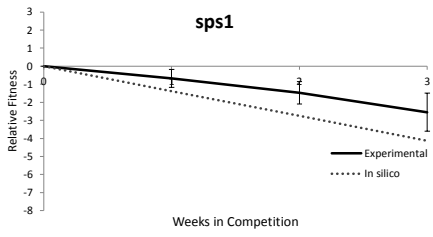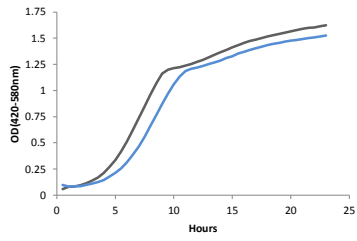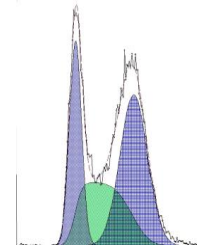

spt4

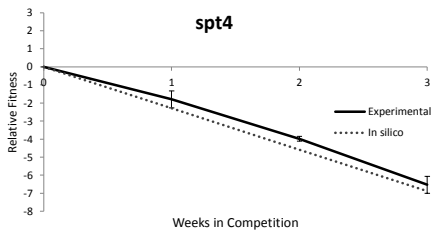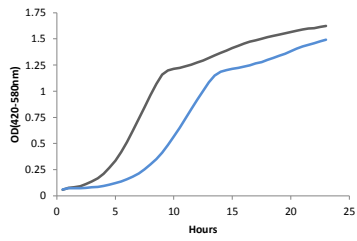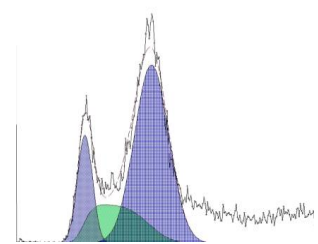

tif1

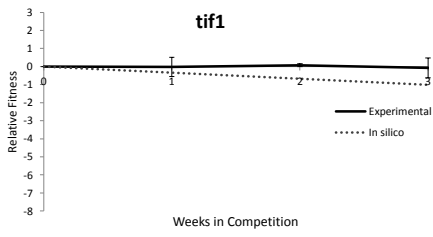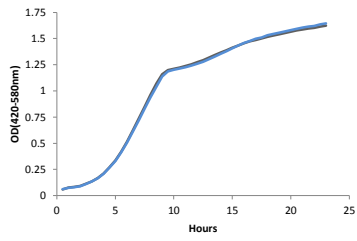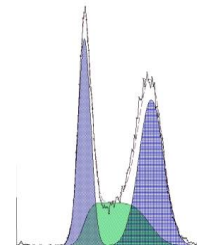

tif2

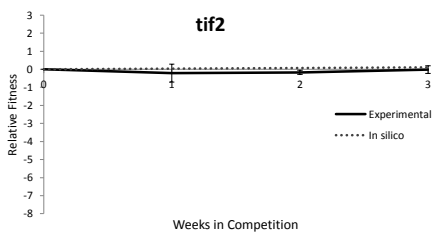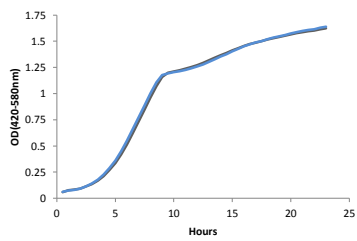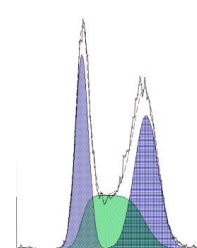

tif4631

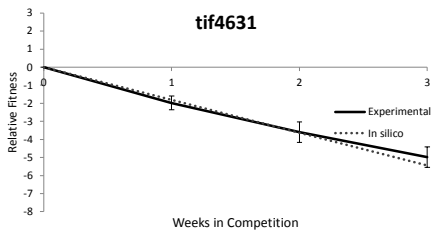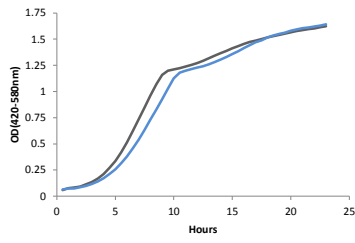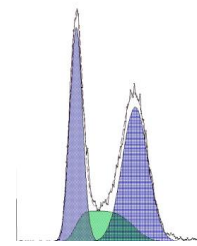

tis11

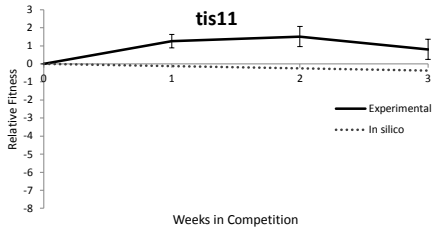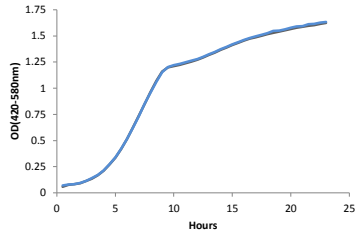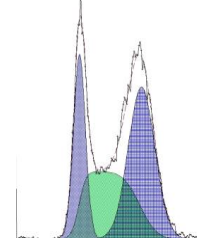

tma19

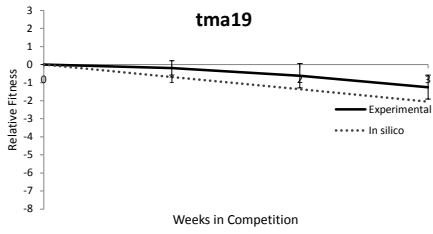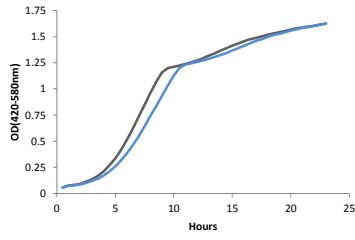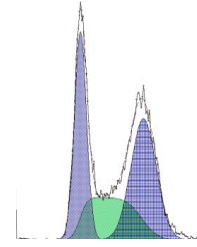

tor1

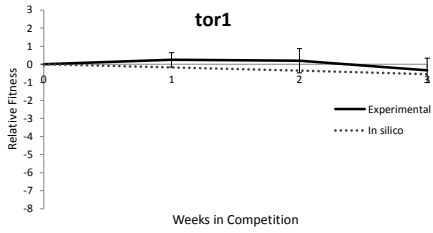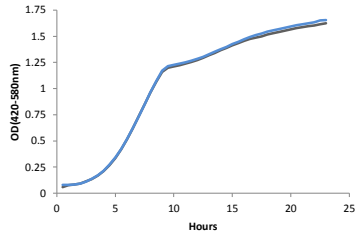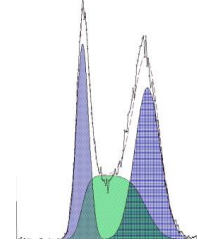

ure2

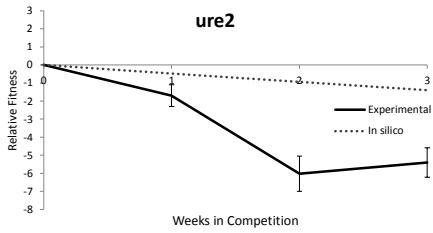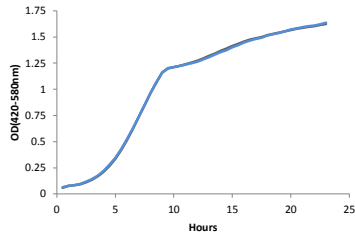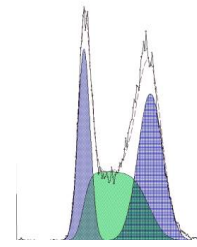

ybr238c

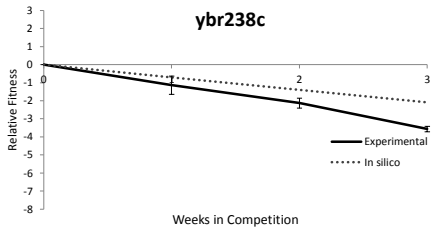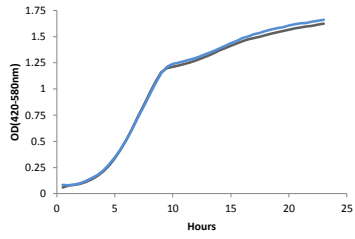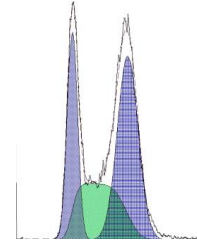

ybr255w

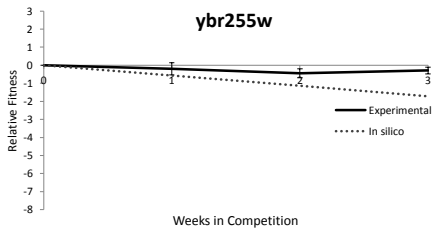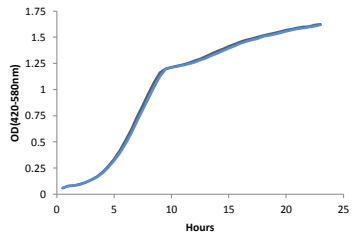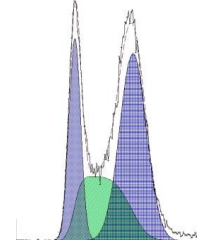



ybr266c

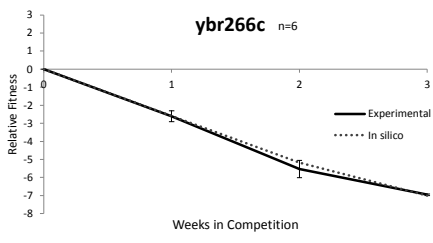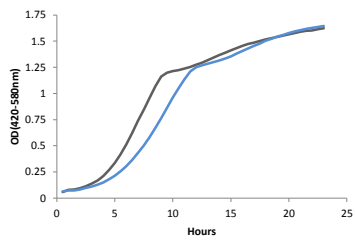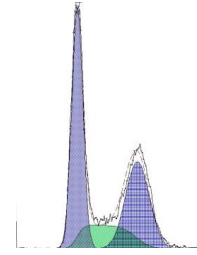

ypt6

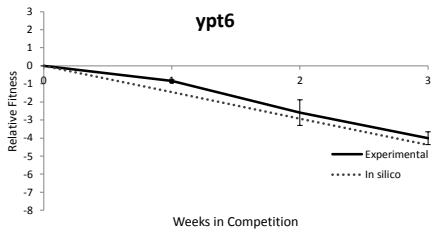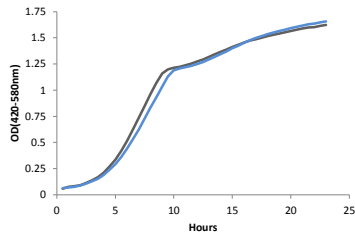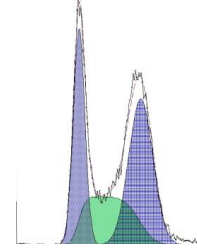

Figure S2

**a**

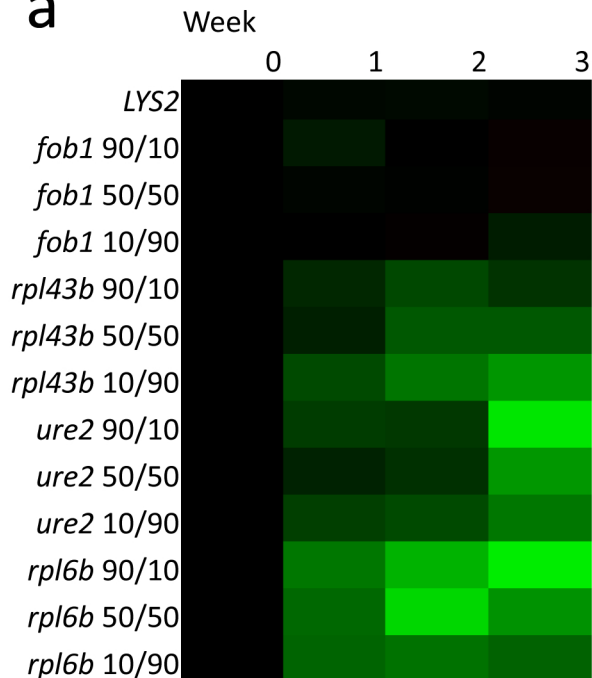

Initial ratio:  
WT/mutant

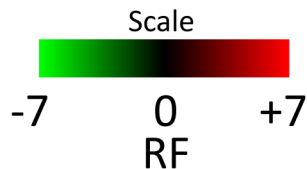

**b**

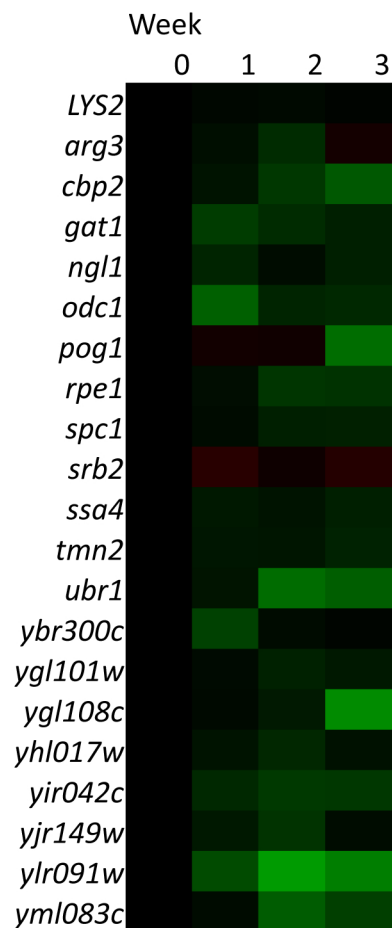

Figure S3

a

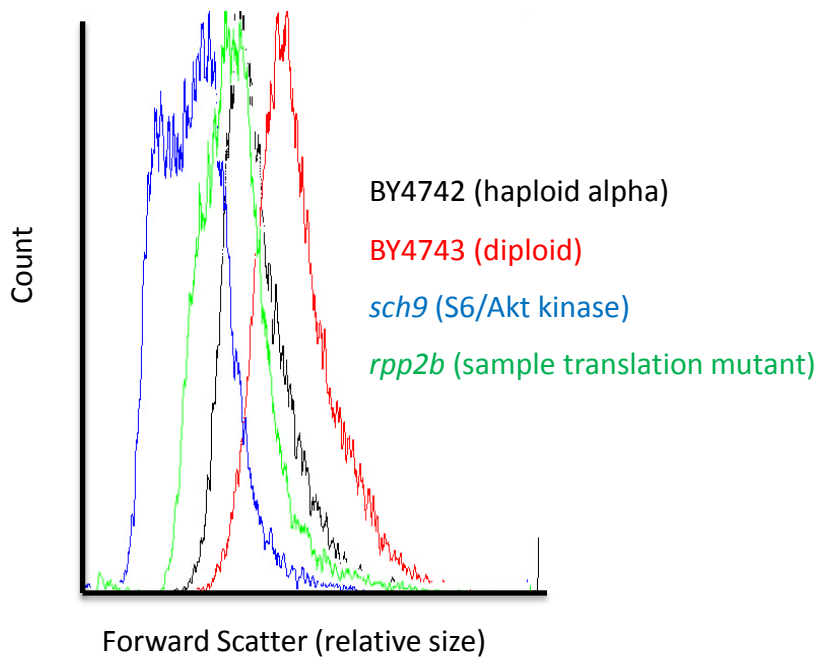

b

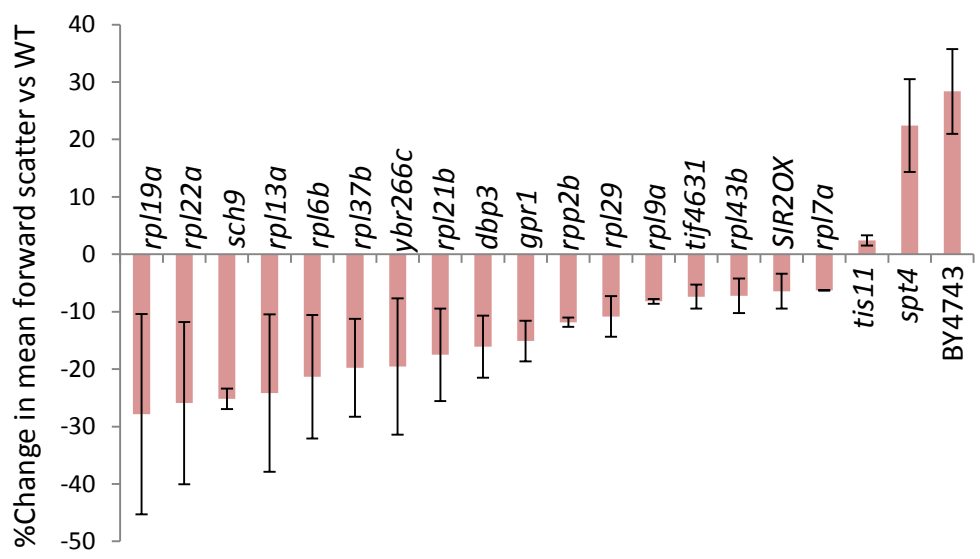

Figure S4

**a**

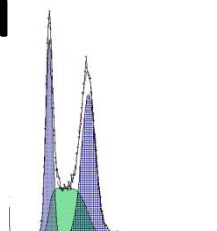

BY4742  
(haploid)

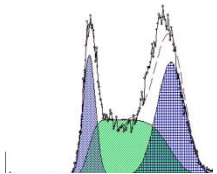

BY4743  
(diploid)

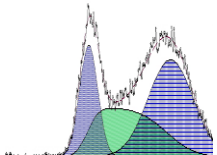

*adh1*  
(*alpha*  
collection)

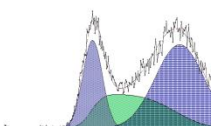

*rom2*  
(*alpha*  
collection)

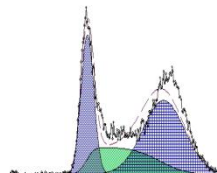

*rpl20b*  
(*alpha*  
collection)

**b**

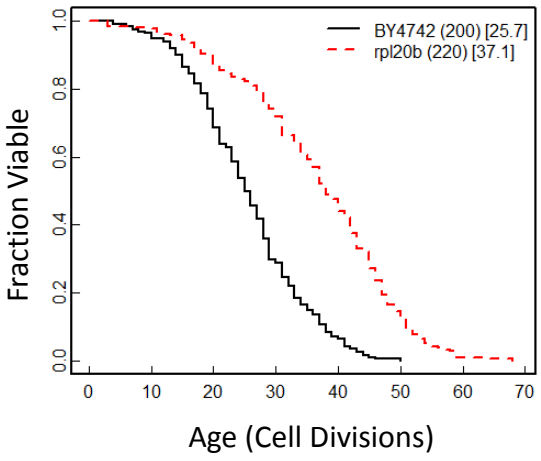

Figure S5

a

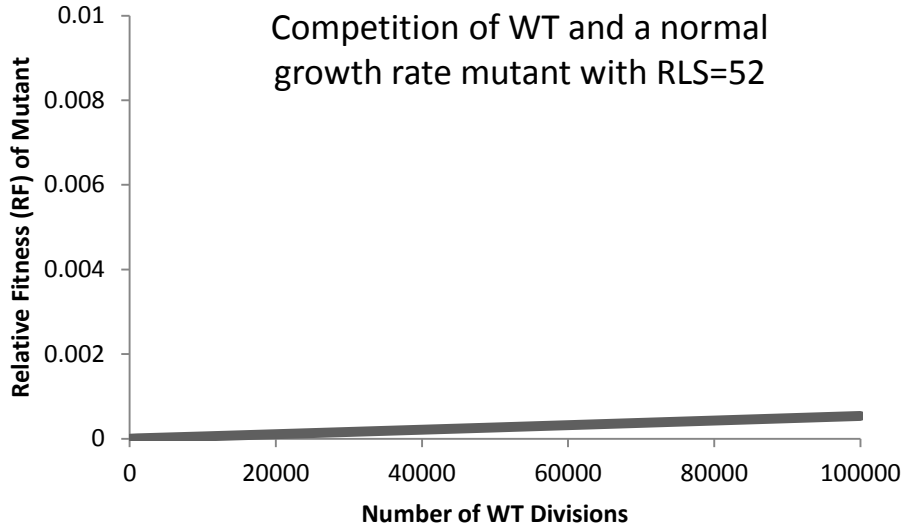

Figure S6

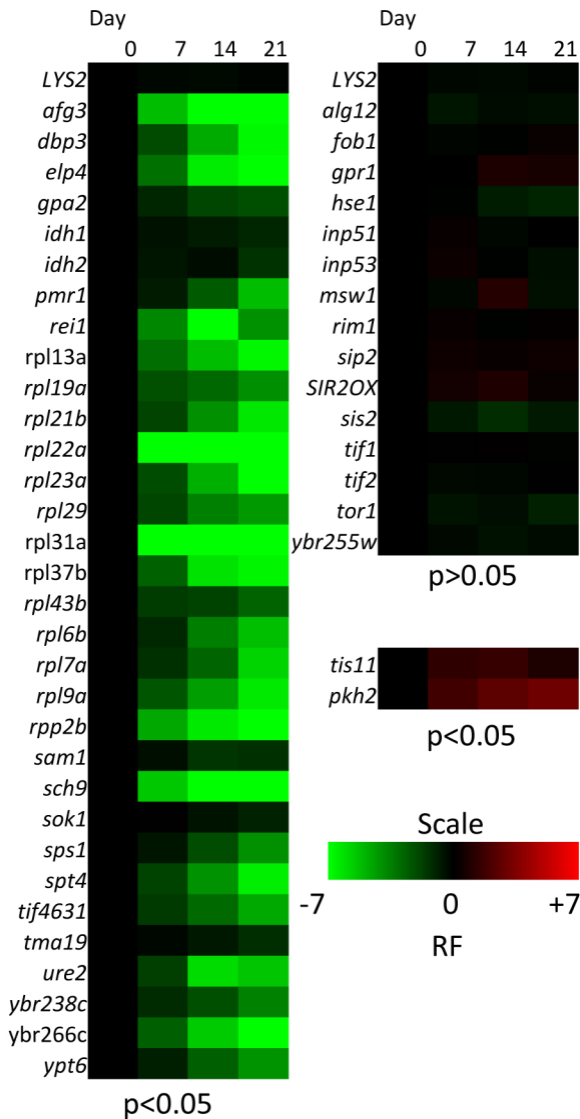

Table S1: Competitive fitness and growth rate data of randomly tested strains

| Strain         | Relative Fitness (RF) | Strain           | Doubling Time (min) | Strain         | Doubling Time (min) |
|----------------|-----------------------|------------------|---------------------|----------------|---------------------|
| <i>arg3</i>    | -1.37 ± 1.08 *        | <i>mnt3</i>      | 85.8 ± 0.5 **       | <i>ubr1</i>    | 93.1 ± 0.3          |
| <i>cbp2</i>    | -2.42 ± 0.81 **       | <i>gpb1</i>      | 87.7 ± 0.6 *        | <i>ssa1</i>    | 93.2 ± 0.2          |
| <i>gat1</i>    | -0.82 ± 0.39 *        | <i>ymr306c-a</i> | 91 ± 1.6            | <i>nap1</i>    | 93.5 ± 1.1          |
| <i>ngl1</i>    | -0.82 ± 0.40 *        | <i>vps30</i>     | 91 ± 0.3            | <i>ydl156w</i> | 93.5 ± 2.5          |
| <i>odc1</i>    | -1.08 ± 0.14 **       | <i>rck2</i>      | 91.5 ± 0.9          | <i>hir3</i>    | 93.6 ± 1.2          |
| <i>pog1</i>    | -0.57 ± 1.20          | <i>yhl017w</i>   | 91.7 ± 0.7          | <i>sti1</i>    | 93.8 ± 1.3 *        |
| <i>rpe1</i>    | -2.58 ± 0.62 **       | <i>ygr176w</i>   | 91.7 ± 1.2          | <i>odc1</i>    | 94.1 ± 1 *          |
| <i>spc1</i>    | -0.87 ± 0.16 *        | <i>yml037c</i>   | 91.7 ± 0.2          | <i>mcm22</i>   | 94.3 ± 0.1          |
| <i>srb2</i>    | 0.99 ± 0.30 **        | <i>tmn2</i>      | 91.9 ± 0.2          | <i>tms1</i>    | 94.5 ± 2.4          |
| <i>ssa4</i>    | -0.44 ± 0.20          | <i>yml083c</i>   | 92.1 ± 0.3          | <i>ytp1</i>    | 94.9 ± 2.7          |
| <i>tmn2</i>    | -0.92 ± 0.15 **       | <i>ygr203w</i>   | 92.1 ± 1.5          | <i>yir042c</i> | 94.9 ± 1.8          |
| <i>ubr1</i>    | -2.57 ± 1.72 **       | <i>scs22</i>     | 92.3 ± 3.8          | <i>spc1</i>    | 95.5 ± 2.3 *        |
| <i>ybr300c</i> | -0.11 ± 0.24          | <i>tax4</i>      | 92.6 ± 0.5          | <i>gat1</i>    | 95.5 ± 2.2 *        |
| <i>ygl101w</i> | -0.46 ± 0.10          | <i>agp1</i>      | 92.6 ± 2.1          | <i>ybl036c</i> | 96 ± 2.2            |
| <i>ygl108c</i> | -1.05 ± 1.43          | <i>fkh2</i>      | 92.7 ± 1.2          | <i>atg16</i>   | 96.6 ± 0 **         |
| <i>yhl017w</i> | -0.45 ± 0.61          | <i>mlc2</i>      | 92.8 ± 0.9          | <i>ygr287c</i> | 96.8 ± 3.5          |
| <i>yir042c</i> | -1.48 ± 0.17 **       | <i>ynl092w</i>   | 92.8 ± 0.8          | <i>ydr065w</i> | 97.5 ± 2.9 *        |
| <i>yjr148w</i> | -0.96 ± 0.47 *        | <i>vhs1</i>      | 92.8 ± 1            | <i>ybr300c</i> | 97.6 ± 0.2 **       |
| <i>ylr091w</i> | -4.86 ± 0.71 **       | <i>git1</i>      | 92.9 ± 0.9          | <i>cpr6</i>    | 97.8 ± 1.7 **       |
| <i>yml083c</i> | -1.72 ± 0.09 **       | <i>ngl1</i>      | 92.9 ± 0.2          | <i>rtt103</i>  | 98.9 ± 1.4 **       |
|                |                       | <i>cos6</i>      | 92.9 ± 1.2          | <i>ade8</i>    | 99 ± 1.6 **         |
|                |                       | <i>yhr182w</i>   | 93 ± 1.3            | <i>nst1</i>    | 99.5 ± 1.3 **       |
|                |                       | <i>ies1</i>      | 93.1 ± 0.4          | <i>ccw12</i>   | 103.8 ± 0.1 **      |
|                |                       | <i>yip3</i>      | 93.1 ± 2.1          | <i>yil110w</i> | 111.9 ± 0.5 **      |
|                |                       | <i>bbc1</i>      | 93.1 ± 0.1          | <i>bud22</i>   | 156.6 ± 3.7 **      |
|                |                       |                  |                     | BY4742         | 91 ± 1.3            |
